# Supplementary material for: Reduced Translocation Confers Paraquat Resistance in Plantago lanceolata
Source: MDPI journal article supplement (doi:10.3390/agronomy14050977), 2024-05-06
Supplement: s1 [file s1]

## Supplementary information

# Reduced Translocation Confers Paraquat Resistance in *Plantago lanceolata*

Vhuthu Ndou<sup>1\*</sup>, Deon Kotze<sup>2</sup>, Biljana Marjanovic-Painter<sup>3</sup> Ethel E. Phiri<sup>1</sup> Petrus J. Pieterse<sup>1</sup> and Molahlehi S. Sonopo<sup>3</sup>

<sup>1</sup> Department of Agronomy, University of Stellenbosch, Stellenbosch 7600, South Africa

<sup>2</sup> Radioanalysis, South African Nuclear Energy Corporation, Pelindaba 0240, South Africa

<sup>3</sup> Radiochemistry, South African Nuclear Energy Corporation, Pelindaba 0240, South Africa

\* Correspondence: nvhuthu@gmail.com or vhuthu.ndou@necsa.co.za

**Figure S1.** Translocation pattern of [<sup>14</sup>C]-paraquat in six individual plants of (S1a) resistant (R) and (S1b) susceptible (S) *Plantago lanceolata* biotypes. The [<sup>14</sup>C]-labelled paraquat was applied as a 1 µL droplet to the midrib (arrowed) of one leaf of each plant. Three to six-week-old (8-15 cm) plants were treated with [<sup>14</sup>C]-paraquat and harvested one day after treatment for phosphor imaging. The scan area is denoted by the blue letter A and was automatically generated by the Amersham Typhoon biomolecular imager control software.

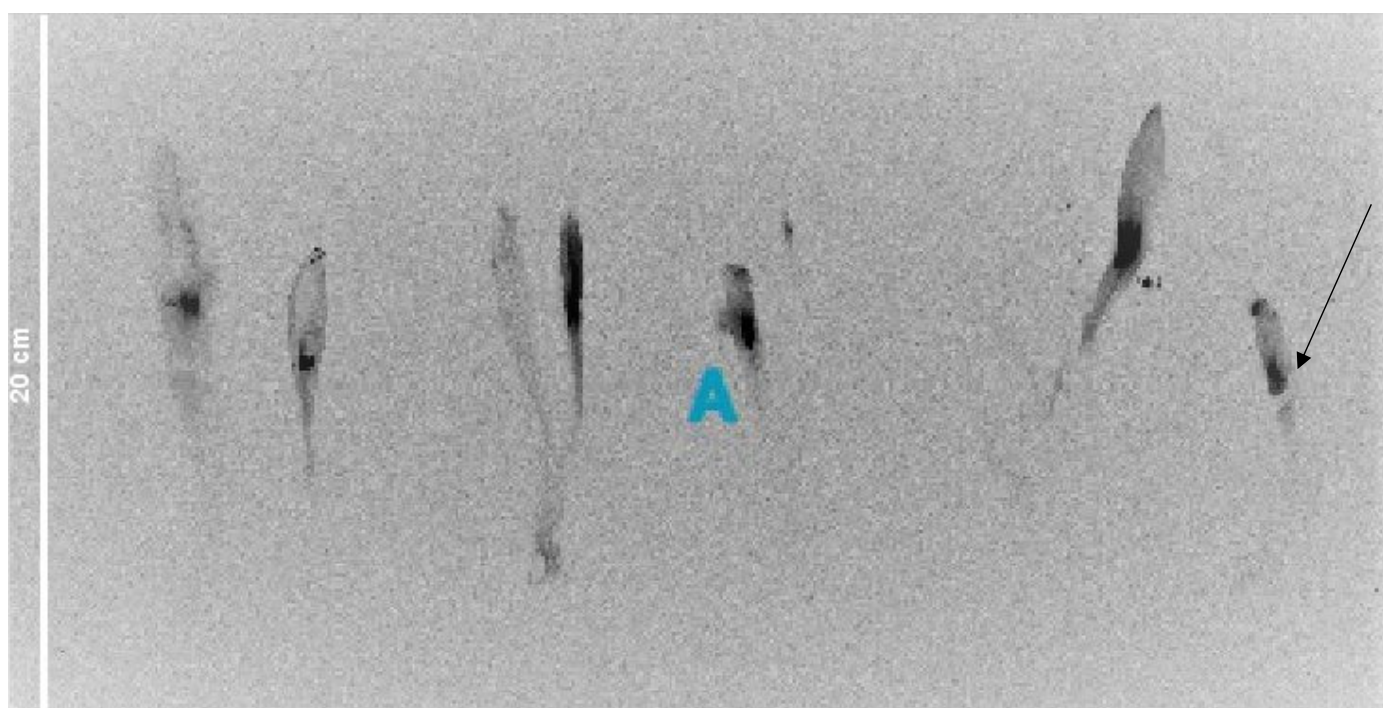

(S1a)

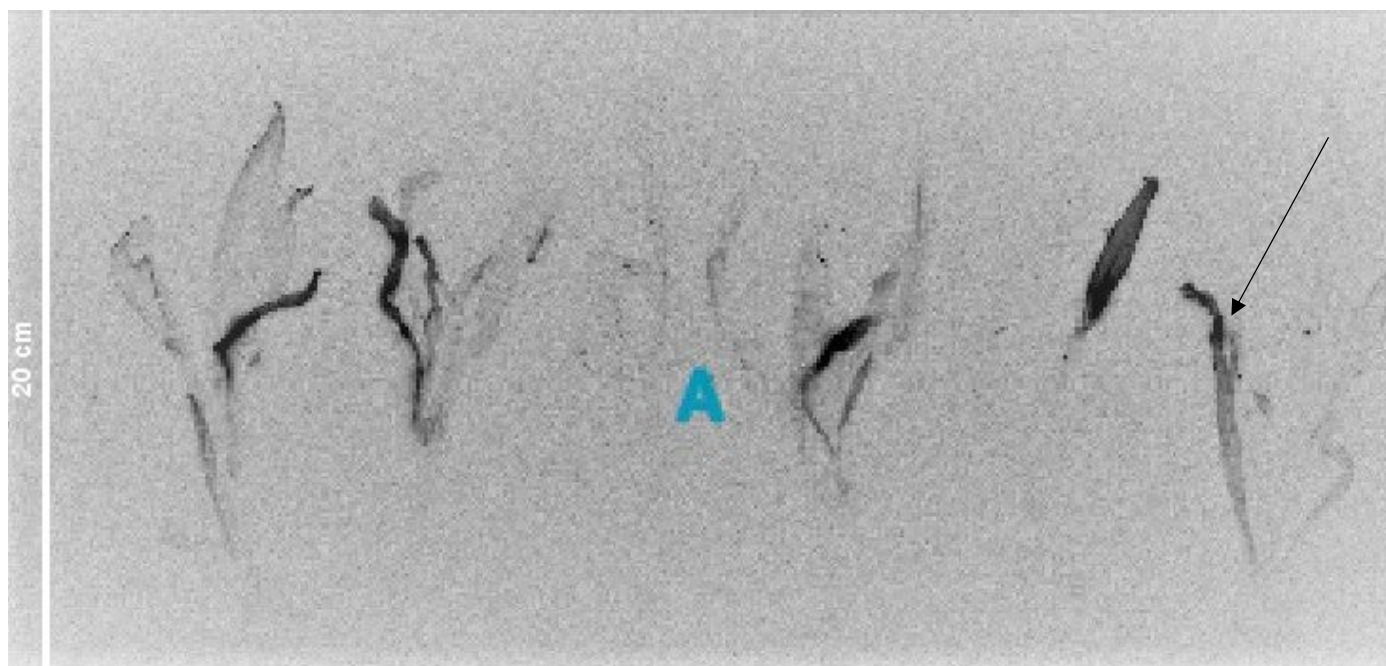

(S1b)
