# Supplementary material for: Reduced Translocation Confers Paraquat Resistance in Plantago lanceolata
Source: MDPI journal article supplement (doi:10.3390/agronomy14050977), 2024-05-06
Supplement: s1 [file s1]

Archive with 1 entries (1 files):
- agronomy-2913959-supplementary.pdf
